# Supplementary material for: Alanyl-Glutamine Protects Mice against Methionine- and Choline-Deficient-Diet-Induced Steatohepatitis and Fibrosis by Modulating Oxidative Stress and Inflammation
Source: MDPI journal article supplement (doi:10.3390/nu14183796), 2022-09-15
Supplement: s1 [file s1]

**Table S1.** Sequence of primers.

| Genes         | Forward primer               | Reverse primer           |
|---------------|------------------------------|--------------------------|
| TNF- $\alpha$ | caggcggcctatgtctc            | cgatcacccgaagttcagtag    |
| IL-1 $\beta$  | gaaatgccacctttgacagtg        | tggatgctctcatcaggacag    |
| MCP-1         | ttaaaaacctggatcggaaccaa      | gcattagcttcagatttacgggt  |
| RANTES        | gctgctttgcctacctctcc         | tcgagtgacaaacacgactgc    |
| Col1a         | acggctgcacgagtcacac          | ggcaggcgggaggtctt        |
| Col3a         | gttctagaggatggctgtactaaacaca | ttgccttgcgtgttgatattc    |
| $\alpha$ -SMA | caggcatggatggcatcaatcac      | actctagctgtgaagtcagtgctc |
| CTGF          | gggcctcttctgcgatttc          | atccaggcaagtgcattggta    |
| TGF- $\beta$  | tgacgtcactggagttgtacgg       | ggttcatgtcatggatgggtgc   |
| CD36          | atgggctgtgatcggaactg         | gtcttccaataagcatgtctcc   |
| FXR           | ggcagaatctggatttggaatcg      | gcccaggttggaatagtaagacg  |
| SHP           | tgggtccaaggagtatgc           | gctccaagacttcacacagtgc   |
| GAPDH         | cggttccgatgccctgaggctctt     | cgtcacacttcatgatggaattga |
